# Supplementary material for: An eQTL Analysis of Partial Resistance to Puccinia hordei in Barley
Source: PLoS One. 2010 Jan 6;5(1):e8598. doi: 10.1371/journal.pone.0008598 (PMC2798965; doi:10.1371/journal.pone.0008598)
Supplement: Table S6 — eQTL for the 128 resistance-correlated genes and positional overlapping with pQTL and Ph-responsive eQTL hotspots. (0.07 MB XLS) [file pone.0008598.s008.xls]

## Sheet: Sheet1
Table S6. eQTL for the 128 resistance-correlated genes and positional overlapping with pQTL and Ph-responsive eQTL hotspots
Hv25-Unigene ID	eQTL associated SNP	Chromosome	cM	R² (%)	LOD	correlation coefficient	p-value	pQTL	Ph-responsive eQTL hotspot	Ph-responsive
gb_UNIGENE21640	2_0502	1H	4.46	77.3	23.4809	0.399796	0.000502693	Rphq14
gb_UNIGENE19223	1_0314	1H	61.16	29.7	5.88608	0.380301	0.000983401
gb_UNIGENE1225	1_0960	1H	91.49	15.2	2.99872	0.513068	4.06056e-06		Hotspot 1
gb_UNIGENE1235	1_0960	1H	91.49	14.8	2.90626	0.486822	1.44965e-05		Hotspot1
gb_UNIGENE14412	2_1057	1H	98.37	13.5	2.60667	0.452238	6.66109e-05		Hotspot 1
gb_UNIGENE21295	2_1057	1H	98.37	20.5	2.9618	0.432912	0.000145805		Hotspot 1	Ph-responsive
gb_UNIGENE2970	2_1057	1H	98.37	21.5	3.71934	-0.425997	0.000190821		Hotspot 1
gb_UNIGENE3592	2_1057	1H	98.37	18.3	3.56007	0.403119	0.000446516		Hotspot 1
gb_UNIGENE14421	2_1057	1H	98.37	17.8	3.01715	0.386012	0.000811315		Hotspot 1
gb_UNIGENE8770	2_1057	1H	98.37	14.8	2.85052	0.383232	0.000891328		Hotspot 1
gb_UNIGENE12317	1_1267	1H	99.94	13.8	2.51186	-0.378485	0.00104467		Hotspot 1	Ph-responsive
gb_UNIGENE11212	2_0657	1H	106.82	25.9	5.06798	-0.385919	0.000813902			Ph-responsive
gb_UNIGENE2581	1_0905	1H	156.14	13.4	2.53086	-0.424115	0.00020512
gb_UNIGENE14866	1_0905	1H	156.14	16.2	2.90626	-0.411086	0.00033438
gb_UNIGENE9767	1_0644	1H	173.7	15.2	2.9248	-0.433829	0.000140629
gb_UNIGENE5255	2_0133	1H	175.24	22	4.25583	-0.381975	0.000929807
gb_UNIGENE2970	2_0563	2H	14	15.4	2.99872	-0.425997	0.000190821
gb_UNIGENE12212	2_1261	2H	38.81	34.1	6.73624	0.380157	0.000988116
gb_UNIGENE11646	1_0296	2H	53.17	22.6	4.32373	0.57589	1.20566e-07
gb_UNIGENE23811	1_1061	2H	68.99	15.1	2.86913	0.456754	0.00035509
gb_UNIGENE12168	2_0748	2H	82.02	34.3	6.39873	-0.391613	0.000669577
gb_UNIGENE18150	1_0474	2H	87.24	39.2	8.11113	-0.423522	0.000209824
gb_UNIGENE7317	1_0407	2H	105.35	85.9	30.8422	0.43125	0.000155626
gb_UNIGENE7166	1_0407	2H	105.35	24.9	4.85659	0.416952	0.000268994
gb_UNIGENE13158	1_0407	2H	105.35	72.1	20.1073	-0.416652	0.000272028
gb_UNIGENE9802	1_0407	2H	105.35	90.1	36.3249	0.410146	0.000346115
gb_UNIGENE11055	1_0407	2H	105.35	70.3	19.1069	0.403073	0.000447255
gb_UNIGENE7348	1_0407	2H	105.35	51.7	11.6636	-0.389354	0.000723794
gb_UNIGENE10135	2_0419	2H	110.23	73.1	20.7897	-0.454947	5.94548e-05
gb_UNIGENE10136	2_0419	2H	110.23	74.3	21.5283	-0.401089	0.000480102
gb_UNIGENE9102	1_0952	2H	111.45	31.7	6.02342	-0.38025	0.000985076
gb_UNIGENE1247	1_0196	2H	115.75	21.8	4.23881	0.435651	0.000130854
gb_UNIGENE18854	1_0196	2H	115.75	26.5	4.90563	0.424776	0.000199987
gb_UNIGENE15276	1_0196	2H	115.75	15	2.88771	0.388451	0.000746555
gb_UNIGENE11806	1_0196	2H	115.75	28.5	5.38772	0.386257	0.000804596
gb_UNIGENE14866	2_0489	2H	117.48	16.8	3.27286	-0.411086	0.00033438
gb_UNIGENE22764	2_0489	2H	117.48	13.8	2.70091	0.409416	0.000355489
gb_UNIGENE24266	2_0489	2H	117.48	78.3	24.1622	0.393083	0.00063631
gb_UNIGENE6250	2_0489	2H	117.48	27.5	5.19666	-0.382521	0.000912917
gb_UNIGENE7644	1_0475	2H	130.23	82.3	27.313	0.52035	2.7986e-06	Rphq11
gb_UNIGENE12506	1_0475	2H	130.23	84.5	29.3026	-0.480017	1.9828e-05	Rphq11
gb_UNIGENE5562	1_0475	2H	130.23	27.6	5.38772	0.466873	3.5641e-05	Rphq11
gb_UNIGENE20608	1_0475	2H	130.23	21.4	4.03309	0.452876	6.48563e-05	Rphq11
gb_UNIGENE18410	1_0475	2H	130.23	73.9	21.1229	-0.449815	7.36746e-05	Rphq11
gb_UNIGENE25228	1_0475	2H	130.23	27.3	5.32429	-0.441641	0.000102949	Rphq11
gb_UNIGENE19081	1_0475	2H	130.23	58.9	14.1913	-0.41951	0.000244338	Rphq11
gb_UNIGENE12147	1_0475	2H	130.23	38.9	7.84295	0.39254	0.000648413	Rphq11
gb_UNIGENE11370	1_0475	2H	130.23	39.7	8.00441	-0.389117	0.000729696	Rphq11
gb_UNIGENE19205	1_0475	2H	130.23	22.2	4.01582	-0.386344	0.000875264	Rphq11
gb_UNIGENE15816	1_0475	2H	130.23	58.9	14.1009	0.380772	0.000968049	Rphq11		Ph-responsive
gb_UNIGENE25788	1_0475	2H	130.23	27.2	4.98702	0.379494	0.00101022	Rphq11
gb_UNIGENE15522	1_0936	2H	131.09	90.4	36.818	-0.498036	8.52479e-06	Rphq11
gb_UNIGENE10081	1_0936	2H	131.09	87.3	32.4329	-0.435617	0.000131026	Rphq11
gb_UNIGENE16687	1_0936	2H	131.09	15.9	2.73845	0.396355	0.000567601	Rphq11
gb_UNIGENE11212	1_0936	2H	131.09	56.8	13.3774	-0.385919	0.000813902	Rphq11		Ph-responsive
gb_UNIGENE5255	1_0936	2H	131.09	14.2	2.47377	-0.381975	0.000929807	Rphq11
gb_UNIGENE17152	1_0936	2H	131.09	26.4	5.08413	0.378565	0.00104189	Rphq11
gb_UNIGENE15767	1_0969	2H	132.26	82	27.0698	-0.439171	0.000113711	Rphq11
gb_UNIGENE17934	1_0969	2H	132.26	74.5	21.6518	-0.407946	0.000375063	Rphq11
gb_UNIGENE3383	1_0969	2H	132.26	24.3	4.74157	-0.394387	0.000608069	Rphq11
gb_UNIGENE3199	1_0969	2H	132.26	15.2	2.7759	0.391062	0.000682439	Rphq11
gb_UNIGENE14163	1_0969	2H	132.26	76	22.5271	-0.444734	0.000848567	Rphq11
gb_UNIGENE2253	1_0969	2H	132.26	35.1	7.12336	-0.380277	0.000984173	Rphq11
gb_UNIGENE20757	1_0214	2H	136.85	57.9	13.6783	-0.536841	1.16612e-06	Rphq11
gb_UNIGENE13970	1_0214	2H	136.85	82	27.1014	-0.512886	4.09792e-06	Rphq11
gb_UNIGENE9814	1_0214	2H	136.85	81.4	26.498	-0.512879	4.80738e-06	Rphq11
gb_UNIGENE20160	1_0214	2H	136.85	76.4	22.8567	-0.474304	2.56601e-05	Rphq11
gb_UNIGENE20372	1_0214	2H	136.85	68.9	18.5101	-0.474276	2.56925e-05	Rphq11
gb_UNIGENE23650	1_0214	2H	136.85	28.1	5.5295	0.429468	0.000166834	Rphq11
gb_UNIGENE2970	1_0214	2H	136.85	52.1	11.5786	-0.425997	0.000190821	Rphq11
gb_UNIGENE7845	2_1007	2H	140.98	92.6	40.9122	0.536762	1.17112e-06	Rphq11
gb_UNIGENE14456	2_1007	2H	140.98	90.8	37.4393	-0.533563	1.39292e-06	Rphq11
gb_UNIGENE6615	2_1007	2H	140.98	94.2	44.679	0.515489	3.5913e-06	Rphq11
gb_UNIGENE1225	2_1007	2H	140.98	67	17.5733	0.513068	4.06056e-06	Rphq11
gb_UNIGENE1242	2_1007	2H	140.98	80.9	25.9852	0.523295	5.5318e-06	Rphq11
gb_UNIGENE1237	2_1007	2H	140.98	73.2	20.884	0.515596	5.79476e-06	Rphq11
gb_UNIGENE1235	2_1007	2H	140.98	67	17.537	0.486822	1.44965e-05	Rphq11
gb_UNIGENE8616	2_1007	2H	140.98	86.6	31.7064	-0.470663	3.01711e-05	Rphq11
gb_UNIGENE21087	2_1007	2H	140.98	40.8	7.40406	-0.444074	9.32753e-05	Rphq11
gb_UNIGENE22118	2_1007	2H	140.98	41.4	8.492	0.418955	0.000249507	Rphq11
gb_UNIGENE19492	2_1007	2H	140.98	15.5	3.03555	0.409843	0.000349971	Rphq11
gb_UNIGENE7391	2_1007	2H	140.98	27.5	5.06798	-0.402175	0.000461853	Rphq11
gb_UNIGENE14421	2_1007	2H	140.98	29.9	5.18064	0.386012	0.000811315	Rphq11
gb_UNIGENE2453	1_0649	2H	141.84	92.6	40.8222	0.591744	4.39889e-08	Rphq11
gb_UNIGENE11646	1_0649	2H	141.84	78.8	24.2997	0.57589	1.20566e-07	Rphq11
gb_UNIGENE6071	1_0649	2H	141.84	81.6	26.7502	0.533954	1.36383e-06	Rphq11
gb_UNIGENE12856	1_0649	2H	141.84	75.3	22.1417	-0.52769	1.90626e-06	Rphq11
gb_UNIGENE12601	1_0649	2H	141.84	69.1	18.5851	-0.508138	5.19895e-06	Rphq11
gb_UNIGENE17168	1_0649	2H	141.84	77.7	23.6589	-0.495841	9.47247e-06	Rphq11
gb_UNIGENE12510	1_0649	2H	141.84	12.5	2.45469	-0.445697	8.72925e-05	Rphq11
gb_UNIGENE9767	1_0649	2H	141.84	13.5	2.68211	-0.433829	0.000140629	Rphq11
gb_UNIGENE2581	1_0649	2H	141.84	18.6	3.43506	-0.424115	0.00020512	Rphq11
gb_UNIGENE26389	1_0649	2H	141.84	63.8	15.9776	-0.3913	0.000676861	Rphq11
gb_UNIGENE13509	1_0731	2H	164.44	59	14.119	0.414064	0.000299556
gb_UNIGENE6795	1_0731	2H	164.44	29.9	5.5921	-0.409996	0.000348015
gb_UNIGENE6859	1_0731	2H	164.44	63.5	16.0337	0.411898	0.000358438
gb_UNIGENE24666	1_0429	2H	167.71	48	10.544	0.379314	0.00101626
gb_UNIGENE9320	1_0429	2H	167.71	18.5	3.57785	-0.400301	0.0010473
gb_UNIGENE191	2_1220	2H	175.17	56.4	13.2344	0.391625	0.000669301
gb_UNIGENE7539	1_0656	2H	188.32	14.9	2.9248	0.441291	0.000104413
gb_UNIGENE15403	1_0656	2H	188.32	16.7	3.01715	0.396772	0.000559347
gb_UNIGENE10871	1_0656	2H	188.32	20.2	2.49282	-0.377324	0.00108561
gb_UNIGENE12910	1_0315	2H	208.42	83.4	28.3121	-0.42707	0.00074262			Ph-responsive
gb_UNIGENE7542	2_0293	2H	218.83	13.1	2.60667	0.393219	0.000633307
gb_UNIGENE23811	1_0173	3H	8.86	31.4	6.02342	0.456754	0.00035509
gb_UNIGENE6795	1_1005	3H	12.63	20.7	3.75451	-0.409996	0.000348015		Hotspot 2
gb_UNIGENE11806	1_1005	3H	12.63	22.6	4.01582	0.386257	0.000804596		Hotspot 2
gb_UNIGENE14163	2_1027	3H	13.49	17.4	3.20022	-0.444734	0.000848567		Hotspot 2
gb_UNIGENE24666	2_1027	3H	13.49	13.2	2.47377	0.379314	0.00101626		Hotspot 2
gb_UNIGENE10135	1_0112	3H	16.18	13.2	2.47377	-0.454947	5.94548e-05		Hotspot 2
gb_UNIGENE7539	1_0112	3H	16.18	17.7	3.38118	0.441291	0.000104413		Hotspot 2
gb_UNIGENE7542	1_0112	3H	16.18	14.7	2.81326	0.393219	0.000633307		Hotspot 2
gb_UNIGENE17654	1_0112	3H	16.18	21.7	4.11913	0.390632	0.000692646		Hotspot 2
gb_UNIGENE7166	2_0595	3H	17.47	24.4	4.5591	0.416952	0.000268994		Hotspot 2
gb_UNIGENE2672	2_0595	3H	17.47	29	5.60771	0.390061	0.000706415		Hotspot 2	Ph-responsive
gb_UNIGENE624	1_0571	3H	18.34	15	2.94331	-0.403041	0.000447756		Hotspot 2
gb_UNIGENE11370	1_0571	3H	18.34	15	2.70091	-0.389117	0.000729696		Hotspot 2
gb_UNIGENE19205	1_0571	3H	18.34	19.8	3.68408	-0.386344	0.000875264		Hotspot 2
gb_UNIGENE12317	1_0571	3H	18.34	37.1	7.10919	-0.378485	0.00104467		Hotspot 2	Ph-responsive
gb_UNIGENE12510	1_0087	3H	25.23	12.6	2.51186	-0.445697	8.72925e-05
gb_UNIGENE12899	2_0338	3H	51.99	23.4	4.44186	-0.379014	0.00102646
gb_UNIGENE2253	1_1387	3H	70.7	17.3	2.98027	-0.380277	0.000984173
gb_UNIGENE21640	1_1084	3H	89.03	13.1	2.51186	0.399796	0.000502693
gb_UNIGENE13509	1_1342	3H	90.87	21.7	4.22177	0.414064	0.000299556
gb_UNIGENE3199	1_1342	3H	90.87	15.5	2.99872	0.391062	0.000682439
gb_UNIGENE1225	2_0931	3H	94.74	18.1	3.45298	0.513068	4.06056e-06
gb_UNIGENE1242	2_0931	3H	94.74	15	2.58775	0.523295	5.5318e-06
gb_UNIGENE4061	1_0172	3H	96.5	13.7	2.60667	0.428605	0.000172525
gb_UNIGENE1235	1_0276	3H	102.65	16.9	3.23658	0.486822	1.44965e-05
gb_UNIGENE15403	1_0276	3H	102.65	25	4.8074	0.396772	0.000559347
gb_UNIGENE21295	2_0136	3H	122.43	18.7	2.51186	0.432912	0.000145805			Ph-responsive
gb_UNIGENE7166	1_0253	3H	126.66	17.4	3.29097	0.416952	0.000268994
gb_UNIGENE2672	2_0626	3H	136.67	13.1	2.60667	0.390061	0.000706415			Ph-responsive
gb_UNIGENE19205	2_0626	3H	136.67	23.7	4.30678	-0.386344	0.000875264
gb_UNIGENE7539	1_0344	3H	144.2	23	4.23881	0.441291	0.000104413		Hotspot 3
gb_UNIGENE15767	1_0344	3H	144.2	17.9	3.47088	-0.439171	0.000113711		Hotspot 3
gb_UNIGENE7542	1_0344	3H	144.2	20.4	3.57785	0.393219	0.000633307		Hotspot 3
gb_UNIGENE21515	2_0023	3H	153.7	28.6	5.60771	0.40518	0.000414607		Hotspot 3
gb_UNIGENE10295	2_0023	3H	153.7	13.1	2.60667	0.39837	0.000528722		Hotspot 3
gb_UNIGENE450	2_0944	3H	168.57	16.7	2.47377	0.414749	0.000292033
gb_UNIGENE19223	2_0944	3H	168.57	51.7	11.5253	0.380301	0.000983401
gb_UNIGENE17654	2_0650	3H	176.16	20.5	3.78961	0.390632	0.000692646
gb_UNIGENE5562	1_0122	3H	189.71	13.3	2.54985	0.466873	3.5641e-05
gb_UNIGENE22764	1_0122	3H	189.71	15.2	2.85052	0.409416	0.000355489
gb_UNIGENE1225	2_0920	3H	195.67	13.8	2.73845	0.513068	4.06056e-06
gb_UNIGENE14421	2_0920	3H	195.67	13.5	2.54985	0.386012	0.000811315
gb_UNIGENE9320	2_1386	3H	200.91	14.9	2.75718	-0.400301	0.0010473
gb_UNIGENE13158	1_1382	4H	60.6	13.3	2.60667	-0.416652	0.000272028
gb_UNIGENE1237	1_0371	4H	64.15	12.6	2.51186	0.515596	5.79476e-06
gb_UNIGENE12212	1_0371	4H	64.15	17.3	2.94331	0.380157	0.000988116
gb_UNIGENE25228	1_1180	4H	65.01	55.3	12.559	-0.441641	0.000102949
gb_UNIGENE24266	1_1180	4H	65.01	21.8	3.73693	0.393083	0.00063631
gb_UNIGENE19492	1_0577	4H	77.65	76.1	22.6378	0.409843	0.000349971
gb_UNIGENE14866	2_0853	4H	78.57	42.1	8.71103	-0.411086	0.00033438
gb_UNIGENE11844	2_0853	4H	78.57	88.4	33.9174	0.39474	0.00086491
gb_UNIGENE12510	1_0046	4H	85.99	31.4	6.26466	-0.445697	8.72925e-05
gb_UNIGENE1247	1_0046	4H	85.99	21.5	4.10196	0.435651	0.000130854
gb_UNIGENE10108	1_0010	4H	101.02	64.9	16.6848	0.397345	0.000548186	Rphq19
gb_UNIGENE16687	1_0010	4H	101.02	47.8	10.4412	0.396355	0.000567601	Rphq19
gb_UNIGENE8511	2_0580	4H	104.18	82.5	27.5027	-0.392848	0.000641523	Rphq19
gb_UNIGENE12899	2_0580	4H	104.18	20.9	3.91182	-0.379014	0.00102646	Rphq19
gb_UNIGENE22308	1_1513	4H	106.05	87.5	32.5975	0.42583	0.000192054	Rphq19
gb_UNIGENE10295	1_1513	4H	106.05	17.4	3.38118	0.39837	0.000528722	Rphq19
gb_UNIGENE16047	1_1513	4H	106.05	23.5	4.25583	0.380313	0.000982987	Rphq19
gb_UNIGENE14412	1_0467	4H	109.72	73.1	20.6532	0.452238	6.66109e-05	Rphq19
gb_UNIGENE8770	1_0467	4H	109.72	18.7	3.50662	0.383232	0.000891328	Rphq19
gb_UNIGENE16261	1_0467	4H	109.72	75.6	22.2605	0.379561	0.00100796	Rphq19
gb_UNIGENE3592	1_0309	4H	113.89	56.1	13.1864	0.403119	0.000446516
gb_UNIGENE19601	1_1500	4H	118.98	27.4	5.34017	0.395359	0.00058776
gb_UNIGENE12701	2_0670	4H	120.71	86.3	31.2591	0.381067	0.000958532
gb_UNIGENE25720	2_0765	4H	130.11	62.5	15.5043	0.418054	0.000258107
gb_UNIGENE6270	2_0765	4H	130.11	84.3	29.1891	0.402108	0.000462965
gb_UNIGENE7474	2_0384	4H	136.51	69.8	18.9149	0.39656	0.000563531
gb_UNIGENE8619	1_0824	4H	143.77	77.2	23.371	0.420412	0.000236157
gb_UNIGENE4663	2_0515	4H	150.99	85.4	30.2954	0.400288	0.000493989
gb_UNIGENE2581	1_1381	5H	11.19	13.9	2.75718	-0.424115	0.00020512
gb_UNIGENE20608	1_0499	5H	51.28	14.6	2.86913	0.452876	6.48563e-05
gb_UNIGENE12212	1_0499	5H	51.28	17.8	3.45298	0.380157	0.000988116
gb_UNIGENE21640	1_0058	5H	76.88	17.2	3.36318	0.399796	0.000502693
gb_UNIGENE23811	1_1375	5H	193.79	18.1	3.38118	0.456754	0.00035509
gb_UNIGENE7542	1_0095	5H	203.19	22.6	4.37447	0.393219	0.000633307
gb_UNIGENE7539	2_0551	5H	212.34	21.5	4.15342	0.441291	0.000104413
gb_UNIGENE25788	1_0104	5H	216.42	15.7	3.01715	0.379494	0.00101022
gb_UNIGENE11891	2_0262	6H	12.49	75.2	22.0166	0.45732	5.3781e-05	Rphq15
gb_UNIGENE8091	2_1032	6H	14.06	85.4	30.3211	-0.390475	0.000696394	Rphq15
gb_UNIGENE14520	2_1032	6H	14.06	67.2	17.5661	0.377357	0.00108443	Rphq15
gb_UNIGENE21295	1_0023	6H	35.52	29.1	4.65889	0.432912	0.000145805	Rphq15		Ph-responsive
gb_UNIGENE624	1_0427	6H	55.2	12.4	2.49282	-0.403041	0.000447756
gb_UNIGENE19081	1_0355	6H	68.58	12.2	2.43559	-0.41951	0.000244338
gb_UNIGENE11370	1_0355	6H	68.58	14.3	2.62556	-0.389117	0.000729696
gb_UNIGENE8511	1_0227	6H	86.82	32.8	6.39873	-0.392848	0.000641523
gb_UNIGENE23109	1_1067	6H	90.14	22.2	4.30678	0.401041	0.000480934
gb_UNIGENE6795	2_0287	6H	100.29	19	3.01715	-0.409996	0.000348015
gb_UNIGENE12910	2_0287	6H	100.29	33.5	3.38118	-0.42707	0.00074262			Ph-responsive
gb_UNIGENE12317	2_0287	6H	100.29	19.6	2.71969	-0.378485	0.00104467			Ph-responsive
gb_UNIGENE17152	1_1349	6H	111.08	15.7	2.86913	0.378565	0.00104189
gb_UNIGENE5255	2_1224	6H	122.02	25.9	5.00324	-0.381975	0.000929807
gb_UNIGENE20757	1_0331	6H	127.28	17.6	3.43506	-0.536841	1.16612e-06
gb_UNIGENE19601	1_1147	6H	131.58	16.5	3.03555	0.395359	0.00058776
gb_UNIGENE9767	2_1491	7H	62.47	41.9	8.82576	-0.433829	0.000140629
gb_UNIGENE12899	1_0772	7H	70.01	16	2.9248	-0.379014	0.00102646
gb_UNIGENE4061	1_0050	7H	82.48	12.4	2.47377	0.428605	0.000172525	Rphq8
gb_UNIGENE11977	1_0267	7H	89.09	59.2	14.308	0.429118	0.000169123	Rphq8
gb_UNIGENE22764	1_0431	7H	91.09	20.6	3.36318	0.409416	0.000355489	Rphq8
gb_UNIGENE12317	1_0431	7H	91.09	29.1	5.6233	-0.378485	0.00104467	Rphq8		Ph-responsive
gb_UNIGENE10595	1_0533	7H	94.32	14	2.71969	0.445561	8.77804e-05	Rphq8
gb_UNIGENE450	1_0533	7H	94.32	56.5	13.3394	0.414749	0.000292033	Rphq8
gb_UNIGENE24362	1_0533	7H	94.32	62.4	15.5787	-0.411957	0.000436438	Rphq8
gb_UNIGENE26145	1_0533	7H	94.32	72.2	20.2792	0.399246	0.000512591	Rphq8
gb_UNIGENE10295	1_0533	7H	94.32	14.9	2.94331	0.39837	0.000528722	Rphq8
gb_UNIGENE15403	1_0533	7H	94.32	16.5	3.21841	0.396772	0.000559347	Rphq8
gb_UNIGENE19601	1_0533	7H	94.32	21	2.88771	0.395359	0.00058776	Rphq8
gb_UNIGENE17311	1_0533	7H	94.32	45.8	9.71447	-0.38917	0.000728369	Rphq8
gb_UNIGENE19205	1_0533	7H	94.32	13.7	2.47377	-0.386344	0.000875264	Rphq8
gb_UNIGENE11371	1_0533	7H	94.32	36.9	7.13751	-0.37874	0.00103587	Rphq8
gb_UNIGENE10871	1_0533	7H	94.32	86.8	31.873	-0.377324	0.00108561	Rphq8
gb_UNIGENE5562	1_0655	7H	97.23	16.9	2.54985	0.466873	3.5641e-05	Rphq8
gb_UNIGENE23109	1_0655	7H	97.23	48.1	10.544	0.401041	0.000480934	Rphq8
gb_UNIGENE16047	1_0655	7H	97.23	32.4	6.42837	0.380313	0.000982987	Rphq8
gb_UNIGENE19223	1_0655	7H	97.23	13.9	2.75718	0.380301	0.000983401	Rphq8
gb_UNIGENE21295	1_0055	7H	100.59	55	12.7578	0.432912	0.000145805	Rphq8		Ph-responsive
gb_UNIGENE18150	1_0055	7H	100.59	74.5	21.6014	-0.423522	0.000209824	Rphq8
gb_UNIGENE7166	1_0055	7H	100.59	15.1	2.9248	0.416952	0.000268994	Rphq8
gb_UNIGENE624	1_0055	7H	100.59	77.5	23.5305	-0.403041	0.000447756	Rphq8
gb_UNIGENE9320	1_1377	7H	109.69	67.8	18.0029	-0.400301	0.0010473	Rphq8
gb_UNIGENE12168	1_1055	7H	110.86	13.3	2.62556	-0.391613	0.000669577	Rphq8
gb_UNIGENE191	1_0089	7H	115.59	29.5	5.22867	0.391625	0.000669301	Rphq8
gb_UNIGENE15276	2_0217	7H	160.03	14.6	2.86913	0.388451	0.000746555
gb_UNIGENE2672	1_0454	7H	186.63	29	4.52569	0.390061	0.000706415			Ph-responsive
gb_UNIGENE13977	no eQTL detected					-0.417601	0.000290795
gb_UNIGENE16534	no eQTL detected					0.380897	0.000964018
gb_UNIGENE23733	no eQTL detected					-0.380876	0.000964671
gb_UNIGENE13577	no eQTL detected					-0.379605	0.00100647
Note: 1) unigene ID are derived from HarvEST assembly #25
Note: 2) genetic location of eQTL-associated SNPs were based on consensus genetic map (L. Ramsay)
